# Supplementary material
Source: MDPI journal article supplement (https://www.mdpi.com/1424-2818/11/12/229)
Supplement: s1 [file s1]

Archive with 3 entries (3 files):
- S1.pdf
- S2.pdf
- S3.pdf
