# Supplementary material
Source: MDPI journal article supplement (https://www.mdpi.com/1424-2818/11/12/229)

Supplement 2. Estimation of uppermost number of clusters according to Evanno et al. [21]. (A) Mean  $L(K)$  over 50 runs for each  $K$ -value. (B) Rate of change of likelihood distribution calculated as  $L'(K) = L(K) - L(K-1)$ . (C) Absolute values of second order rate of change of the likelihood distribution calculated as  $|L''(K)| = |L'(K+1) - L'(K)|$ . (D)  $\Delta K$  calculated as  $\Delta K = m|L''(K)|/sd[L(K)]$ . The highest  $\Delta K$  indicates the true  $K$  or the uppermost level of structure, which is here four clusters.

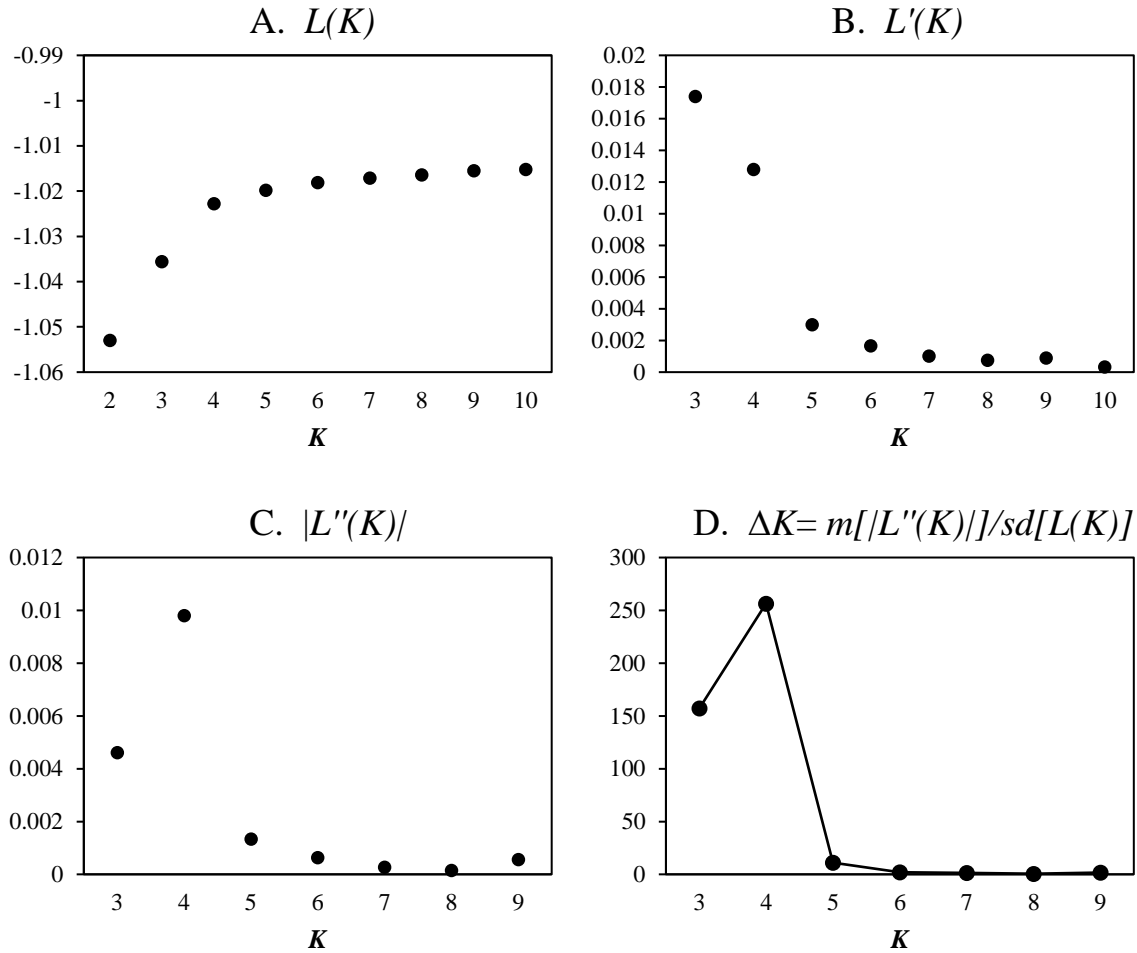

Supplement: s1 [file s1]
